# Supplementary material for: Protein corona formation of human serum albumin with carbon quantum dots from roast salmon
Source: Royal Society of Chemistry journal article supplement (doi:10.1039/c9fo02967b), 2020-01-01
Supplement: c9fo02967b1.pdf [file c9fo02967b1.pdf]

## Supplemental Materials

### **Protein Corona Formation of Human Serum Albumin with Carbon Quantum Dots from Roasted Salmon**

Yukun Song<sup>abc</sup>, Haitao Wang<sup>abc</sup>, Lijuan Zhang<sup>abc</sup>, Bin Lai<sup>abc</sup>, Kangjing Liu<sup>abc</sup> and Mingqian Tan<sup>abc\*</sup>

*<sup>a</sup>School of Food Science and Technology, National Engineering Research Center of Seafood, Dalian Polytechnic University, Dalian 116034, China*

*<sup>b</sup>Engineering Research Center of Seafood of Ministry of Education of China, Dalian 116034, China*

*<sup>c</sup>Collaborative Innovation Center of Seafood Deep Processing, Dalian Polytechnic University, Dalian 116034, China*

\* To whom correspondence should be addressed. E-mail: M. Tan, 2468750030@qq.com, ORCID: 0000000275350035. Qinggongyuan 1, Ganjingzi District, Dalian 116034, China

Table S1. Contents of the identified glucose metabolites showing significant difference obtained from the CQDs and HSA-CQD coronas groups using serum-free DMEM medium as blank control.

| Component Name                   | Control-1 | Control-2 | Control-3 | Control-4 | Control-5 | Control-6 | CQDs-1   | CQDs-2   | CQDs-3   | CQDs-4   | CQDs-5   | CQDs-6   | HSA-CQDs-1 | HSA-CQDs-2 | HSA-CQDs-3 | HSA-CQDs-4 | HSA-CQDs-5 | HSA-CQDs-6 |
|----------------------------------|-----------|-----------|-----------|-----------|-----------|-----------|----------|----------|----------|----------|----------|----------|------------|------------|------------|------------|------------|------------|
| Nicotinamide                     | 0.035607  | 0.045438  | 0.22583   | 0.034865  | 0.026234  | 0.072678  | 1.313305 | 1.059553 | 0.977885 | 1.09746  | 0.531771 | 0.766082 | 0.418497   | 0.462943   | 0.667616   | 1.333333   | 0.329074   | 0.68419    |
| Taurine                          | 0.1149    | 0.086758  | 0.100442  | 0.087621  | 0.081827  | 0.101638  | 0.057387 | 0.062462 | 0.053549 | 0.064315 | 0.060176 | 0.060014 | 0.072552   | 0.092355   | 0.089726   | 0.089972   | 0.09012    | 0.076504   |
| N-Acetyl-L-alanine               | 0.011203  | 0.010578  | 0.015877  | 0.011362  | 0.012967  | 0.013407  | 0.007999 | 0.006756 | 0.006455 | 0.008429 | 0.008413 | 0.007468 | 0.00899    | 0.013139   | 0.017808   | 0.014516   | 0.010614   | 0.010423   |
| Octulose-monophosphate (OSP-O1P) | 0.003462  | 0.003836  | 0.002884  | 0.004448  | 0.002517  | 0.004432  | 0.008687 | 0.004891 | 0.006308 | 0.005682 | 0.006154 | 0.00594  | 0.00701    | 0.006596   | 0.006301   | 0.006098   | 0.006983   | 0.005077   |
| 2-ketohaxanoic acid              | 0.002759  | 0.003872  | 0.005293  | 0.002343  | 0.004496  | 0.002317  | 0.003053 | 0.000537 | 0.00035  | 0.000782 | 0.001217 | 0.000563 | 0.000759   | 0.00112    | 0.00247    | 0.000984   | 0.000511   | 0.002788   |
| Dihydroxy-acetone-phosphate      | 0.002294  | 0.003744  | 0.002209  | 0.001333  | 0.002419  | 0.001576  | 0.005903 | 0.003988 | 0.004081 | 0.00421  | 0.002757 | 0.005915 | 0.003831   | 0.002864   | 0.004567   | 0.006473   | 0.004466   | 0.003637   |
| Phosphorylcholine                | 0.578732  | 1.558455  | 1.192817  | 0.472378  | 1.706531  | 2.364746  | 3.007531 | 1.832506 | 5.774038 | 3.643339 | 3.575521 | 5.73715  | 2.453757   | 4.467136   | 2.095206   | 2.364413   | 3.583815   | 3.269896   |
| CTP                              | 0.00193   | 0.000916  | 0.00148   | 0.001728  | 0.001079  | 0.001197  | 0.000521 | 0.000386 | 0.000581 | 0.000939 | 0.001089 | 0.00089  | 0.000794   | 0.000691   | 0.000866   | 0.001293   | 0.001428   | 0.000603   |
| Ribose-phosphate                 | 0.002547  | 0.002053  | 0.002894  | 0.00212   | 0.001675  | 0.00354   | 0.005492 | 0.005185 | 0.005476 | 0.009939 | 0.00314  | 0.005821 | 0.001778   | 0.002608   | 0.00137    | 0.00379    | 0.003428   | 0.002137   |
| Inosine                          | 0.000892  | 0.001309  | 0.001008  | 0.000693  | 0.00121   | 0.000947  | 0.025301 | 0.00982  | 0.011334 | 0.005386 | 0.004966 | 0.010486 | 0.001819   | 0.003531   | 0.002939   | 0.001702   | 0.003179   | 0.002354   |
| Hexose-phosphate                 | 0.010558  | 0.005725  | 0.005524  | 0.003689  | 0.005364  | 0.00369   | 0.009555 | 0.00789  | 0.008296 | 0.010665 | 0.007241 | 0.010589 | 0.005924   | 0.007169   | 0.007574   | 0.010398   | 0.00544    | 0.004015   |
| Uric acid                        | 0.045355  | 0.028782  | 0.027496  | 0.012093  | 0.010258  | 0.003979  | 0.00296  | 0.00118  | 0.002844 | 0.001686 | 0.002924 | 0.001237 | 0.002775   | 0.001696   | 0.006142   | 0.006917   | 0.003423   | 0.007684   |
| Indoleacrylic acid               | 0.008916  | 0.008288  | 0.007996  | 0.001958  | 0.00533   | 0.00288   | 0.003557 | 0.001394 | 0.000958 | 0.00304  | 0.002542 | 0.001888 | 0.001875   | 0.001607   | 0.003597   | 0.00904    | 0.001801   | 0.003451   |
| P-aminobenzoate                  | 0.012072  | 0.012352  | 0.007383  | 0.003807  | 0.002399  | 0.005626  | 0.004083 | 0.001742 | 0.00058  | 0.002006 | 0.003062 | 0.00173  | 0.002068   | 0.000614   | 0.007072   | 0.007212   | 0.002238   | 0.004122   |
| Phenylpyruvate                   | 0.003781  | 0.006088  | 0.004547  | 0.001757  | 0.001635  | 0.001347  | 0.001008 | 0.000804 | 0.000466 | 0.001555 | 0.001007 | 0.00063  | 0.000476   | 0.000844   | 0.001444   | 0.001656   | 0.000475   | 0.000932   |
| Pantothenate                     | 0.031211  | 0.021309  | 0.017204  | 0.015581  | 0.018631  | 0.015518  | 0.016751 | 0.010481 | 0.012583 | 0.017477 | 0.011172 | 0.009133 | 0.012102   | 0.016868   | 0.016644   | 0.017959   | 0.012248   | 0.014608   |
| Glutathione disulfide            | 0.029888  | 0.025647  | 0.044592  | 0.044707  | 0.039364  | 0.05406   | 0.053352 | 0.047611 | 0.056348 | 0.045877 | 0.048621 | 0.056046 | 0.090136   | 0.097378   | 0.121404   | 0.098009   | 0.126412   | 0.082522   |
| Amino adipic acid                | 0.013538  | 0.011005  | 0.002052  | 0.005024  | 0.002265  | 0.004069  | 0.00138  | 0.000802 | 0.000861 | 0.001754 | 0.001447 | 0.001223 | 0.000646   | 0.001059   | 0.003289   | 0.002147   | 0.001      | 0.001555   |

Table S2. Contents of the identified lipids metabolites showing significant difference obtained from the cells treated with CQDs and HSA-CQD coronas groups using serum-free DMEM medium as blank control.

| Component Name | Control-1 | Control-2 | Control-3 | Control-4 | Control-5 | Control-6 | CQDs-1   | CQDs-2   | CQDs-3   | CQDs-4   | CQDs-5   | CQDs-6   | HSA-CQDs-1 | HSA-CQDs-2 | HSA-CQDs-3 | HSA-CQDs-4 | HSA-CQDs-5 | HSA-CQDs-6 |
|----------------|-----------|-----------|-----------|-----------|-----------|-----------|----------|----------|----------|----------|----------|----------|------------|------------|------------|------------|------------|------------|
| Cer 38:3-6     | 0.00023   | 0.000136  | 0.000198  | 0.000167  | 0.000247  | 0.000161  | 4.75E-05 | 9.07E-05 | 4.21E-05 | 0.000117 | 8.46E-05 | 0.000108 | 7.77E-05   | 0.00015    | 0.000143   | 0.000254   | 0.000235   | 0.000122   |
| FA 23:0        | 0.005841  | 0.005048  | 0.004401  | 0.003162  | 0.004617  | 0.005278  | 0.002946 | 0.00321  | 0.003178 | 0.003005 | 0.002507 | 0.002894 | 0.005908   | 0.005283   | 0.004104   | 0.006033   | 0.006442   | 0.005963   |
| LPC 22:0       | 0.000666  | 0.000527  | 0.000565  | 0.000592  | 0.000558  | 0.000529  | 0.000716 | 0.000815 | 0.000878 | 0.000746 | 0.00086  | 0.00069  | 0.000659   | 0.000382   | 0.000565   | 0.000628   | 0.000518   | 0.000369   |
| LPC 26:1       | 0.000614  | 0.000509  | 0.000484  | 0.000547  | 0.000515  | 0.000543  | 0.000684 | 0.00077  | 0.000873 | 0.000795 | 0.000815 | 0.000632 | 0.000731   | 0.000415   | 0.000649   | 0.000626   | 0.000523   | 0.000387   |
| LPE 18:1       | 4.47E-05  | 2.42E-05  | 3.16E-05  | 3.00E-05  | 3.04E-05  | 2.56E-05  | 5.66E-05 | 5.00E-05 | 6.14E-05 | 5.87E-05 | 3.30E-05 | 4.36E-05 | 4.95E-05   | 2.86E-05   | 2.78E-05   | 1.64E-05   | 2.44E-05   | 4.50E-05   |
| PC 23:0        | 4.43E-05  | 3.08E-05  | 4.53E-05  | 3.05E-05  | 3.71E-05  | 3.49E-05  | 5.84E-05 | 6.53E-05 | 6.08E-05 | 5.76E-05 | 7.62E-05 | 5.49E-05 | 5.32E-05   | 3.34E-05   | 5.32E-05   | 4.85E-05   | 4.02E-05   | 3.41E-05   |
| PC 28:2        | 0.000305  | 0.000295  | 0.000307  | 0.000295  | 0.000274  | 0.000296  | 0.000388 | 0.000342 | 0.000397 | 0.000345 | 0.000435 | 0.000337 | 0.000351   | 0.000265   | 0.000344   | 0.000331   | 0.000295   | 0.000179   |
| PC 29:1        | 0.002017  | 0.001636  | 0.001613  | 0.002054  | 0.001778  | 0.001504  | 0.004159 | 0.003079 | 0.003679 | 0.003512 | 0.002975 | 0.003373 | 0.002413   | 0.003076   | 0.003054   | 0.003317   | 0.002944   | 0.002435   |
| PC 29:2        | 0.000397  | 0.000463  | 0.000461  | 0.000543  | 0.000425  | 0.000453  | 0.000621 | 0.000641 | 0.000761 | 0.000747 | 0.000636 | 0.000555 | 0.000596   | 0.000319   | 0.00062    | 0.000558   | 0.000375   | 0.000299   |
| PC 30:3        | 0.000566  | 0.000883  | 0.000572  | 0.000567  | 0.000495  | 0.000487  | 0.001041 | 0.000999 | 0.002224 | 0.001207 | 0.00151  | 0.001782 | 0.000892   | 0.000589   | 0.001069   | 0.000903   | 0.000574   | 0.00033    |
| PC 30:4        | 7.25E-05  | 6.23E-05  | 3.78E-05  | 3.95E-05  | 3.73E-05  | 3.32E-05  | 0.000106 | 7.01E-05 | 8.71E-05 | 0.00014  | 9.95E-05 | 9.67E-05 | 5.65E-05   | 4.97E-05   | 4.87E-05   | 5.03E-05   | 8.45E-05   | 4.66E-05   |
| PC 35:5-2      | 0.002133  | 0.001537  | 0.001564  | 0.002076  | 0.00176   | 0.001749  | 0.002589 | 0.00226  | 0.002484 | 0.002586 | 0.002412 | 0.001952 | 0.002445   | 0.001508   | 0.001882   | 0.002153   | 0.001596   | 0.001095   |
| PC 36:6        | 0.011957  | 0.008455  | 0.010009  | 0.010881  | 0.009638  | 0.009009  | 0.015056 | 0.015714 | 0.017458 | 0.015724 | 0.015473 | 0.01513  | 0.015575   | 0.010974   | 0.015      | 0.014471   | 0.011558   | 0.009685   |
| PC 38:5-1      | 0.284601  | 0.239425  | 0.260482  | 0.273748  | 0.263636  | 0.245083  | 0.312987 | 0.293321 | 0.324304 | 0.292115 | 0.304824 | 0.297217 | 0.257236   | 0.212152   | 0.289796   | 0.284323   | 0.219202   | 0.170315   |
| PC 38:5-3      | 0.080083  | 0.070102  | 0.098609  | 0.170037  | 0.153525  | 0.122449  | 0.227458 | 0.29026  | 0.315121 | 0.215121 | 0.215028 | 0.252597 | 0.258256   | 0.166419   | 0.213729   | 0.211596   | 0.144991   | 0.155937   |
| PC 39:7        | 0.007776  | 0.005329  | 0.005532  | 0.006369  | 0.006019  | 0.005839  | 0.007999 | 0.008597 | 0.009224 | 0.007876 | 0.009527 | 0.007683 | 0.007135   | 0.005603   | 0.007334   | 0.008152   | 0.005685   | 0.004343   |
| PC 41:2-1      | 0.000607  | 0.000998  | 0.000555  | 0.00182   | 0.00118   | 0.002096  | 0.003455 | 0.003817 | 0.003664 | 0.003223 | 0.003807 | 0.003399 | 0.002539   | 0.00276    | 0.003002   | 0.002678   | 0.002646   | 0.002589   |
| PC 42:0        | 0.001384  | 0.001647  | 0.0016    | 0.001964  | 0.001547  | 0.001737  | 0.002257 | 0.002149 | 0.002232 | 0.002394 | 0.002082 | 0.002044 | 0.001918   | 0.001133   | 0.001654   | 0.001846   | 0.001685   | 0.000955   |
| PC 42:11       | 0.001562  | 0.001203  | 0.001375  | 0.001561  | 0.001353  | 0.001248  | 0.001703 | 0.00172  | 0.001872 | 0.001891 | 0.001915 | 0.00163  | 0.001447   | 0.001227   | 0.0016     | 0.001633   | 0.001266   | 0.00097    |
| PC 42:4        | 0.005201  | 0.005408  | 0.005536  | 0.005698  | 0.005484  | 0.005107  | 0.005918 | 0.005978 | 0.006015 | 0.006531 | 0.00623  | 0.005681 | 0.005651   | 0.004052   | 0.005798   | 0.005585   | 0.004228   | 0.003219   |
| PC 42:6        | 0.023228  | 0.018302  | 0.023173  | 0.028544  | 0.028924  | 0.02231   | 0.031197 | 0.031586 | 0.039481 | 0.027978 | 0.032004 | 0.032857 | 0.029388   | 0.024109   | 0.028887   | 0.030724   | 0.021336   | 0.018108   |
| PC 46:1        | 0.000113  | 0.000344  | 0.000238  | 0.000229  | 0.000211  | 0.000175  | 0.000564 | 0.000559 | 0.000569 | 0.000295 | 0.000448 | 0.000524 | 0.000491   | 0.000158   | 0.000257   | 0.000343   | 0.000258   | 0.000206   |
| PC 46:2        | 0.000402  | 0.00036   | 0.000536  | 0.000484  | 0.000386  | 0.000488  | 0.000827 | 0.000905 | 0.000811 | 0.000876 | 0.000738 | 0.000762 | 0.000801   | 0.000462   | 0.000644   | 0.000695   | 0.00068    | 0.000551   |

|             |          |          |          |          |          |          |          |          |          |          |          |          |          |          |          |          |          |          |
|-------------|----------|----------|----------|----------|----------|----------|----------|----------|----------|----------|----------|----------|----------|----------|----------|----------|----------|----------|
| PC O-31:1-1 | 0.652597 | 0.533117 | 0.589981 | 0.617161 | 0.592208 | 0.579314 | 0.658256 | 0.675232 | 0.704731 | 0.681447 | 0.734601 | 0.666976 | 0.645826 | 0.489332 | 0.664286 | 0.663915 | 0.511781 | 0.365306 |
| PC O-34:4-1 | 0.00115  | 0.000997 | 0.001254 | 0.00146  | 0.001399 | 0.001315 | 0.001771 | 0.002068 | 0.002069 | 0.001967 | 0.001518 | 0.00186  | 0.001434 | 0.001081 | 0.001743 | 0.001859 | 0.000975 | 0.000776 |
| PC O-38:1-1 | 0.024443 | 0.025705 | 0.029963 | 0.029184 | 0.034165 | 0.029332 | 0.041169 | 0.045538 | 0.042505 | 0.039555 | 0.045928 | 0.045631 | 0.041809 | 0.029601 | 0.038673 | 0.04154  | 0.028627 | 0.027412 |
| PC O-38:5-2 | 0.057913 | 0.038089 | 0.053386 | 0.054536 | 0.039054 | 0.046299 | 0.077486 | 0.071837 | 0.078738 | 0.071614 | 0.073803 | 0.07423  | 0.066058 | 0.054833 | 0.077236 | 0.068015 | 0.054879 | 0.044425 |
| PC O-38:7   | 0.003251 | 0.00162  | 0.003561 | 0.003603 | 0.003659 | 0.003285 | 0.004727 | 0.004724 | 0.004994 | 0.004469 | 0.005132 | 0.004906 | 0.004256 | 0.003498 | 0.004321 | 0.005153 | 0.003759 | 0.002772 |
| PC O-39:1   | 0.089879 | 0.141558 | 0.167625 | 0.161224 | 0.149722 | 0.142022 | 0.169017 | 0.186456 | 0.209926 | 0.208349 | 0.217904 | 0.199722 | 0.154453 | 0.159184 | 0.186456 | 0.178386 | 0.142857 | 0.13859  |
| PC O-41:1   | 0.001481 | 0.002062 | 0.00254  | 0.002378 | 0.002285 | 0.002118 | 0.003288 | 0.003391 | 0.004078 | 0.003455 | 0.003358 | 0.003309 | 0.002838 | 0.002496 | 0.003046 | 0.00307  | 0.002495 | 0.002074 |
| PC O-41:3   | 0.011345 | 0.016058 | 0.018766 | 0.019981 | 0.018896 | 0.016373 | 0.021494 | 0.024082 | 0.024406 | 0.024416 | 0.024443 | 0.024249 | 0.019425 | 0.017134 | 0.022774 | 0.021707 | 0.017356 | 0.014963 |
| PE O-36:2-2 | 0.001102 | 0.001186 | 0.001078 | 0.00119  | 0.001055 | 0.001172 | 0.001366 | 0.001157 | 0.001397 | 0.001474 | 0.00137  | 0.001351 | 0.00099  | 0.000817 | 0.001119 | 0.001269 | 0.000921 | 0.000628 |
| PE O-36:4-1 | 0.002327 | 0.001897 | 0.001925 | 0.002244 | 0.001851 | 0.002076 | 0.002254 | 0.002546 | 0.002707 | 0.002351 | 0.002354 | 0.002417 | 0.00213  | 0.001698 | 0.002383 | 0.002358 | 0.00161  | 0.001237 |
| PE O-38:6-1 | 0.001816 | 0.001925 | 0.001599 | 0.001609 | 0.001886 | 0.001519 | 0.002083 | 0.002389 | 0.002308 | 0.002064 | 0.002067 | 0.002188 | 0.002339 | 0.00137  | 0.002199 | 0.002412 | 0.00151  | 0.00189  |
| PE O-40:3   | 0.00272  | 0.003899 | 0.004039 | 0.003582 | 0.003521 | 0.003029 | 0.005836 | 0.005312 | 0.006008 | 0.005059 | 0.00533  | 0.004484 | 0.004519 | 0.0043   | 0.004419 | 0.004163 | 0.004124 | 0.002542 |
| PE O-40:4   | 0.006977 | 0.007247 | 0.007271 | 0.007352 | 0.008214 | 0.006651 | 0.007952 | 0.008383 | 0.009647 | 0.00892  | 0.009508 | 0.009274 | 0.008878 | 0.006688 | 0.008691 | 0.008631 | 0.006372 | 0.004542 |
| PE O-40:6-9 | 0.003494 | 0.002838 | 0.002905 | 0.00354  | 0.003435 | 0.002764 | 0.003916 | 0.003933 | 0.004591 | 0.004092 | 0.004147 | 0.004257 | 0.00402  | 0.002699 | 0.003304 | 0.003614 | 0.002825 | 0.002171 |
| PI 34:0     | 0.000685 | 0.000686 | 0.00067  | 0.000861 | 0.000715 | 0.0008   | 0.000922 | 0.00086  | 0.000942 | 0.001161 | 0.001138 | 0.000988 | 0.000819 | 0.000734 | 0.000981 | 0.000948 | 0.000735 | 0.000624 |
| PI 36:0-1   | 0.000532 | 0.000538 | 0.000668 | 0.00065  | 0.000659 | 0.000649 | 0.000837 | 0.000858 | 0.00086  | 0.000922 | 0.000994 | 0.000881 | 0.000862 | 0.000589 | 0.000791 | 0.000792 | 0.000701 | 0.000576 |
| PI 36:0-2   | 0.000476 | 0.00052  | 0.000517 | 0.000561 | 0.00058  | 0.000576 | 0.000748 | 0.000788 | 0.000808 | 0.000839 | 0.000878 | 0.000897 | 0.000777 | 0.000544 | 0.000768 | 0.000705 | 0.000601 | 0.000558 |
| PI 36:4-3   | 0.004795 | 0.004817 | 0.005699 | 0.005817 | 0.005837 | 0.005276 | 0.006418 | 0.006625 | 0.007179 | 0.007532 | 0.008056 | 0.006975 | 0.006288 | 0.00488  | 0.006959 | 0.006519 | 0.005389 | 0.0051   |
| PI 37:3     | 0.00017  | 0.000113 | 0.000155 | 0.000111 | 0.000164 | 0.000172 | 0.000303 | 0.000301 | 0.000257 | 0.000174 | 0.000323 | 0.000301 | 0.000263 | 0.000202 | 0.000179 | 0.000226 | 0.000214 | 0.000199 |
| PI 40:4-1   | 0.00039  | 0.000409 | 0.000441 | 0.000421 | 0.000466 | 0.000369 | 0.000495 | 0.000517 | 0.000546 | 0.000527 | 0.000569 | 0.000553 | 0.000495 | 0.000419 | 0.000466 | 0.000405 | 0.000466 | 0.000432 |
| PI 40:5-1   | 0.000206 | 0.000271 | 0.000235 | 0.000367 | 0.000411 | 0.000326 | 0.000407 | 0.000394 | 0.000452 | 0.000446 | 0.000502 | 0.000453 | 0.000344 | 0.000339 | 0.000418 | 0.000338 | 0.000345 | 0.00034  |
| PI 40:5-2   | 0.002687 | 0.002905 | 0.003077 | 0.003125 | 0.003045 | 0.003067 | 0.003391 | 0.003548 | 0.004055 | 0.00397  | 0.004169 | 0.004186 | 0.003397 | 0.003145 | 0.003576 | 0.003675 | 0.003248 | 0.003072 |
| PS 40:5     | 0.003957 | 0.004156 | 0.00425  | 0.005213 | 0.005425 | 0.004929 | 0.005627 | 0.005825 | 0.005487 | 0.005688 | 0.006263 | 0.006403 | 0.005499 | 0.004772 | 0.005578 | 0.005236 | 0.004831 | 0.004808 |
| SM 32:1     | 0.02218  | 0.021058 | 0.021419 | 0.022171 | 0.020955 | 0.021122 | 0.025955 | 0.02641  | 0.028312 | 0.026614 | 0.028358 | 0.024731 | 0.023581 | 0.017848 | 0.024137 | 0.024332 | 0.019499 | 0.014378 |
| SM 33:1     | 0.037913 | 0.039453 | 0.035724 | 0.043609 | 0.035121 | 0.037941 | 0.059768 | 0.050798 | 0.053071 | 0.047301 | 0.049091 | 0.044481 | 0.047597 | 0.031549 | 0.043738 | 0.045028 | 0.030733 | 0.035909 |
| SM 33:2     | 0.000877 | 0.001007 | 0.000872 | 0.001126 | 0.000878 | 0.000972 | 0.001391 | 0.001217 | 0.001214 | 0.0012   | 0.001245 | 0.001122 | 0.001083 | 0.000564 | 0.000897 | 0.000919 | 0.000577 | 0.000606 |
| SM 34:0     | 0.137199 | 0.104267 | 0.118367 | 0.139332 | 0.119295 | 0.119388 | 0.145826 | 0.161874 | 0.187106 | 0.157607 | 0.17885  | 0.152134 | 0.130241 | 0.091549 | 0.153525 | 0.144898 | 0.092208 | 0.06616  |
| PE 21:0     | 0.005336 | 0.003835 | 0.004054 | 0.004536 | 0.00432  | 0.004581 | 0.006455 | 0.007452 | 0.008338 | 0.008074 | 0.007913 | 0.00683  | 0.00677  | 0.004408 | 0.006975 | 0.006751 | 0.005013 | 0.003614 |
| PE 39:2     | 0.024982 | 0.037806 | 0.031821 | 0.040323 | 0.031156 | 0.038067 | 0.051555 | 0.050059 | 0.057231 | 0.046497 | 0.044123 | 0.053052 | 0.055094 | 0.034149 | 0.045595 | 0.038851 | 0.036405 | 0.029114 |

|             |          |          |          |          |          |          |          |          |          |          |          |          |          |          |          |          |          |          |
|-------------|----------|----------|----------|----------|----------|----------|----------|----------|----------|----------|----------|----------|----------|----------|----------|----------|----------|----------|
| PE 39:5-2   | 0.209784 | 0.164735 | 0.198813 | 0.227119 | 0.229019 | 0.195037 | 0.267632 | 0.280693 | 0.298504 | 0.253147 | 0.276181 | 0.264545 | 0.246735 | 0.167062 | 0.261458 | 0.224365 | 0.153954 | 0.14664  |
| PE 39:6     | 0.205082 | 0.280456 | 0.246022 | 0.285443 | 0.262645 | 0.249109 | 0.279269 | 0.367609 | 0.364047 | 0.282118 | 0.323201 | 0.327476 | 0.30729  | 0.220185 | 0.291617 | 0.29043  | 0.215531 | 0.256709 |
| PE 39:7     | 0.050107 | 0.033507 | 0.04664  | 0.04854  | 0.05222  | 0.045215 | 0.054453 | 0.052862 | 0.065899 | 0.057659 | 0.06388  | 0.055165 | 0.049537 | 0.043529 | 0.05431  | 0.057943 | 0.037283 | 0.029494 |
| PG 43:5     | 0.258901 | 0.248393 | 0.418251 | 0.303076 | 0.403042 | 0.391981 | 0.412375 | 0.55859  | 0.483581 | 0.611822 | 0.547183 | 0.562046 | 0.363291 | 0.388178 | 0.417214 | 0.418251 | 0.36018  | 0.329831 |
| TAG 54:3-3  | 0.198518 | 0.069933 | 0.034393 | 0.052079 | 0.066802 | 0.064603 | 0.505975 | 0.430927 | 0.481119 | 0.317639 | 0.72825  | 0.217543 | 0.267925 | 0.134512 | 0.225335 | 0.164866 | 0.115703 | 0.155521 |
| TAG 54:4-4  | 0.178991 | 0.314293 | 0.300908 | 0.411807 | 0.244503 | 0.498566 | 1.4663   | 1.372132 | 1.330784 | 1.143642 | 1.400335 | 1.036807 | 0.955306 | 0.919455 | 0.684751 | 0.736138 | 0.677581 | 0.585325 |
| TAG 54:6-2  | 0.329589 | 0.073446 | 0.048709 | 0.069431 | 0.10815  | 0.05662  | 0.851099 | 0.678537 | 0.656071 | 0.805449 | 0.691922 | 0.443834 | 0.568117 | 0.270793 | 0.11262  | 0.287763 | 0.126434 | 0.442161 |
| TAG 56:1-1  | 0.03903  | 0.036305 | 0.074355 | 0.063337 | 0.111711 | 0.054828 | 0.195196 | 0.210994 | 0.201243 | 0.26673  | 0.21881  | 0.112954 | 0.0913   | 0.123064 | 0.155784 | 0.17249  | 0.133676 | 0.122777 |
| TAG 56:2-2  | 0.072658 | 0.073446 | 0.090033 | 0.075239 | 0.151649 | 0.136902 | 0.229876 | 0.280354 | 0.314771 | 0.431644 | 0.368786 | 0.25478  | 0.188791 | 0.161592 | 0.236807 | 0.180139 | 0.169742 | 0.149522 |
| TAG 56:3-1  | 0.399379 | 0.099307 | 0.066061 | 0.059536 | 0.10521  | 0.092854 | 0.515057 | 0.898901 | 0.781549 | 1.016491 | 1.488528 | 0.805927 | 0.168595 | 0.268881 | 0.653681 | 0.779637 | 0.715344 | 0.429493 |
| TAG 56:6-6  | 0.090535 | 0.142041 | 0.050932 | 0.039484 | 0.057218 | 0.085803 | 0.454111 | 0.377868 | 0.428298 | 0.490918 | 0.404398 | 0.309273 | 0.290631 | 0.345363 | 0.268881 | 0.227223 | 0.284656 | 0.326004 |
| TAG(p) 54:1 | 0.737094 | 0.582457 | 0.97108  | 0.445746 | 0.816444 | 0.832935 | 1.130736 | 1.030354 | 1.058078 | 1.266252 | 1.078633 | 0.86544  | 0.676625 | 0.760755 | 0.913241 | 0.950765 | 1.066922 | 0.590822 |
| TAG(p) 56:3 | 0.469407 | 0.395076 | 0.625478 | 0.381931 | 0.456979 | 0.473709 | 1.24283  | 1.011472 | 1.05043  | 1.422084 | 1.034417 | 0.72347  | 0.756453 | 0.672323 | 0.761711 | 0.736616 | 0.852294 | 0.525335 |

Table S3. Body and major organ weight of mice after oral administration of 0.9% NaCl (control) and CQDs.

| Gender     | Items mice | Percentage of body (%) |           |
|------------|------------|------------------------|-----------|
|            |            | 0.9% NaCl              | CQDs      |
| Female     | Whole body | 100±12.34              | 100±14.65 |
|            | Intestines | 9.43±0.68              | 8.51±1.15 |
|            | Stomach    | 1.26±0.25              | 1.49±0.23 |
|            | Spleen     | 0.42±0.14              | 0.43±0.13 |
|            | Kidney     | 1.38±0.13              | 1.31±0.12 |
|            | Liver      | 4.93±0.47              | 4.65±0.46 |
|            | Heart      | 0.81±0.14              | 0.84±0.13 |
|            | Lung       | 1.07±0.13              | 0.91±0.11 |
|            | Brain      | 2.85±0.26              | 2.58±0.18 |
|            | Male       | Whole body             | 100±11.89 |
| Intestines |            | 8.84±0.62              | 8.72±1.10 |
| Stomach    |            | 1.43±0.30              | 1.48±0.25 |
| Spleen     |            | 0.41±0.06              | 0.33±0.10 |
| Kidney     |            | 1.65±0.18              | 1.47±0.18 |
| Liver      |            | 4.76±0.57              | 4.78±0.59 |
| Heart      |            | 0.97±0.12              | 0.88±0.10 |
| Lung       |            | 0.73±0.34              | 0.80±0.09 |
| Brain      |            | 2.26±0.21              | 2.10±0.22 |

Note: the differences between the CQDs and control for body and each major organ weight were not significant.

Table S4. Comparison of GPT, AST, ALP, LDH, urea and creatinine of mice serum orally administrated 0.9% NaCl (control) and CQDs.

| Gender | Biochemical index                 | 0.9% NaCl (n=10) | CQDs (n=10)   |
|--------|-----------------------------------|------------------|---------------|
| Female | GPT (U L <sup>-1</sup> )          | 36.80±8.58       | 41.90±9.93    |
|        | AST (U L <sup>-1</sup> )          | 143.60±32.85     | 141.11±30.41  |
|        | ALP (U L <sup>-1</sup> )          | 169.00±34.28     | 128.00±22.57  |
|        | LDH (U L <sup>-1</sup> )          | 793.50±118.33    | 640.00±96.87  |
|        | Urea (mg dL <sup>-1</sup> )       | 7.21±0.96        | 7.57±1.55     |
|        | Creatinine (mg dL <sup>-1</sup> ) | 92.20±4.38       | 78.89±13.12   |
| Male   | GPT (U L <sup>-1</sup> )          | 34.80±8.87       | 39.22±7.64    |
|        | AST (U L <sup>-1</sup> )          | 104.50±19.28     | 124.78±18.21  |
|        | ALP (U L <sup>-1</sup> )          | 196.00±63.55     | 150.57±23.55  |
|        | LDH (U L <sup>-1</sup> )          | 605.67±105.19    | 714.75±102.17 |
|        | Urea (mg dL <sup>-1</sup> )       | 10.41±0.34       | 8.73±1.45     |
|        | Creatinine (mg dL <sup>-1</sup> ) | 87.60±12.97      | 83.63±17.52   |

Note: the differences between the CQDs and control for body and each major organ weight were not significant.

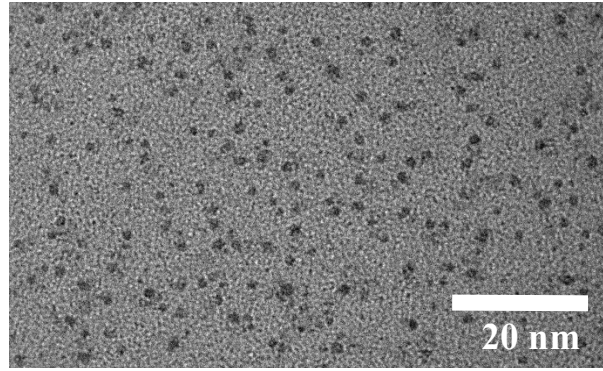

Fig. S1. TEM image of CQDs derived from roast salmon.



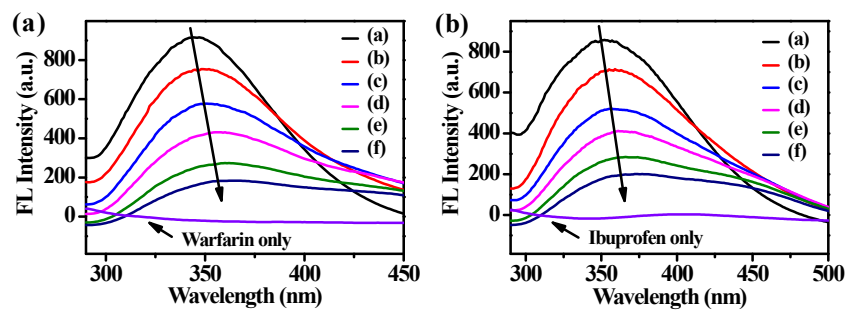

Fig. S2. Fluorescence changes of the HSA-CQDs system upon adding (a) warfarin and (b) ibuprofen.  $c_{\text{(HSA)}} = c_{\text{(warfarin)}} = c_{\text{(ibuprofen)}} = 1 \times 10^{-5}$  mol/L;  $c_{\text{(CQDs)}} = 0, 0.5, 1, 1.5, 2,$  and  $2.5$  (a-f), respectively.  $T = 298$  K,  $\lambda_{\text{ex}} = 280$  nm.

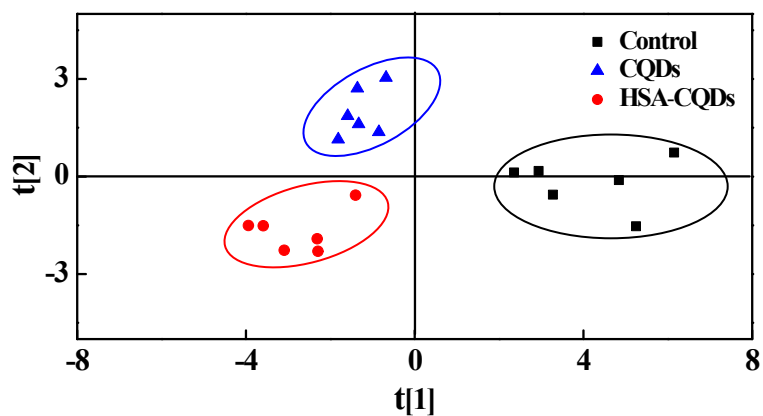

Fig. S3. PLS-DA score plot of glucose metabolism profile models constructed from NRK samples of the CQDs and HSA-CQD coronas groups using serum-free DMEM medium as blank control ( $R^2X=0.615$ ,  $R^2Y = 0.856$ ,  $Q^2$  (cum) = 0.792).

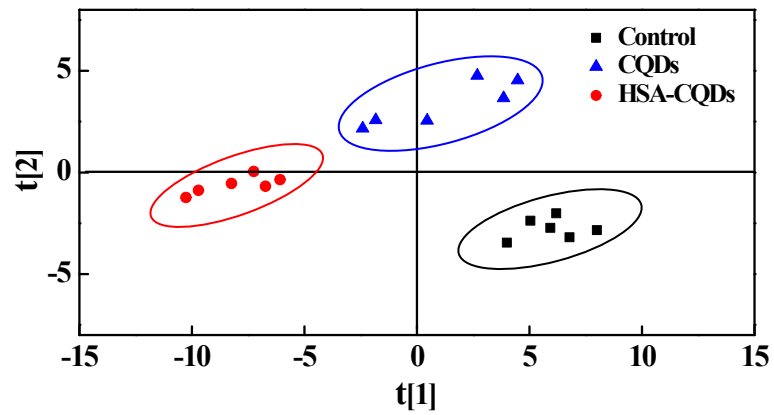

Fig. S4. PLS-DA score plot of lipid profile models constructed from NRK cells of the CQDs and HSA-CQD coronas groups ( $R^2X = 0.818$ ,  $R^2Y = 0.974$  and  $Q^2$  (cum) = 0.929) using serum-free DMEM medium as blank control.
